# Supplementary material for: TNFRSF1A Gene Polymorphism (−610 T > G, rs4149570) as a Predictor of Malnutrition and a Prognostic Factor in Patients Subjected to Intensity-Modulated Radiation Therapy Due to Head and Neck Cancer
Source: MDPI journal article supplement (doi:10.3390/cancers14143407), 2022-07-13
Supplement: s1 [file s1]

# ***TNFRSF1A* Gene Polymorphism (–610T > G, rs4149570) as a Predictor of Malnutrition and a Prognostic Factor in Patients Subjected to Intensity-Modulated Radiation Therapy Due to Head and Neck Cancer**

**Table S1.** Comparison of demographic, laboratory and nutritional variables depending on *TNFRSF1A* genotypes.

| Variable                   | <i>TNFRSF1A</i> genotype<br>median<br>(interquartile range) |                        |          |                        |                        |          |
|----------------------------|-------------------------------------------------------------|------------------------|----------|------------------------|------------------------|----------|
|                            | TT                                                          | GT and GG              | <i>p</i> | GG                     | GT and TT              | <i>p</i> |
| Age [years]                | 61.50<br>(51.00-70.00)                                      | 63.00<br>(56.25-68.75) | 0.5696   | 65.00<br>(58.50-71.00) | 61.00<br>(56.00-67.00) | 0.1189   |
| Weight [kg]                | 69.00<br>(67.00-78.00)                                      | 66.00<br>(55.00-71.75) | 0.0866   | 68.00<br>(58.50-79.50) | 66.00<br>(55.0-70.00)  | 0.0785   |
| BMI [kg/m <sup>2</sup> ]   | 22.95<br>(22.84-26.73)                                      | 22.84<br>(19.70-25.04) | 0.2752   | 24.54<br>(20.18-26.86) | 22.84<br>(19.72-24.69) | 0.1575   |
| Total protein [g/L]        | 6.43<br>(6.16-6.71)                                         | 6.64<br>(6.22-7.02)    | 0.2686   | 6.78<br>(6.03-7.07)    | 6.58<br>(6.22-6.88)    | 0.7051   |
| Albumin [g/L]              | 3.40<br>(3.11-3.75)                                         | 3.37<br>(3.22-3.55)    | 0.9939   | 3.31<br>(3.17-3.53)    | 3.38<br>(3.24-3.56)    | 0.2727   |
| Prealbumin[g/dL]           | 0.20<br>(0.10-0.20)                                         | 0.20<br>(0.20-0.30)    | 0.0234*  | 0.20<br>(0.20-0.30)    | 0.20<br>(0.20-0.20)    | 0.7921   |
| Transferrin [g/L]          | 2.50<br>(2.30-2.70)                                         | 2.30<br>(1.92-3.07)    | 0.7557   | 2.10<br>(1.52-3.17)    | 2.50<br>(2.10-2.90)    | 0.2896   |
| FM [kg]                    | 20.47<br>(14.40-24.89)                                      | 18.56<br>(13.62-23.63) | 0.6011   | 19.95<br>(11.88-24.72) | 18.48<br>(13.88-23.49) | 0.9026   |
| FM%                        | 26.94<br>(23.67-34.52)                                      | 26.70<br>(22.53-34.59) | 0.9215   | 26.94<br>(22.08-36.69) | 26.70<br>(23.65-33.82) | 0.7638   |
| FFM [kg]                   | 50.70<br>(44.35-57.27)                                      | 47.58<br>(44.59-53.07) | 0.3592   | 47.57<br>(44.63-52.60) | 47.75<br>(44.52-53.68) | 0.6009   |
| FFM%                       | 72.90<br>(65.48-76.54)                                      | 73.94<br>(65.32-77.48) | 0.8026   | 73.24<br>(63.35-81.25) | 73.94<br>(66.04-76.54) | 0.7980   |
| FFMI [kg/m <sup>2</sup> ]  | 17.70<br>(16.59-18.28)                                      | 16.53<br>(14.97-18.43) | 0.1899   | 16.50<br>(16.00-16.79) | 16.75<br>(14.85-18.46) | 0.3614   |
| nFFMI [kg/m <sup>2</sup> ] | 18.50<br>(17.20-18.56)                                      | 17.22<br>(15.27-18.75) | 0.2283   | 16.98<br>(16.38-17.71) | 17.41<br>(15.16-18.81) | 0.4101   |

\* - statistically significant result.

Abbreviations: BMI - body mass index, FM – fat mass, FFM – fat-free mass, FFMI - fat-free mass index, nFFMI - normalized fat-free mass index, *TNFRSF1A* - Tumor Necrosis Factor Receptor Superfamily Member 1A gene.

**Table S2.** Comparison of demographic, clinical and nutritional variables depending on SGA.

| Variable                   | SGA<br>median<br>(interquartile range) |                     |          |                     |                     |          |
|----------------------------|----------------------------------------|---------------------|----------|---------------------|---------------------|----------|
|                            | A                                      | B and C             | <i>p</i> | A and B             | C                   | <i>p</i> |
| Age [years]                | 65.00 (53.75-71.50)                    | 61.50 (57.00-68.00) | 0.7587   | 61.00 (56.00-67.00) | 64.50 (58.00-71.00) | 0.3856   |
| Weight [kg]                | 76.00 (69.75-83.00)                    | 65.00 (54.50-68.00) | <0.0001* | 68.00 (57.25-76.00) | 66.00 (55.00-68.00) | 0.2669   |
| BMI [kg/m <sup>2</sup> ]   | 25.69 (24.53-30.12)                    | 22.44 (19.31-23.60) | <0.0001* | 24.45 (19.86-25.71) | 21.55 (18.96-22.91) | 0.0126*  |
| Total protein[g/L]         | 6.69 (6.48-7.05)                       | 6.58 (6.21-6.95)    | 0.4036   | 6.61 (6.24-6.95)    | 6.60 (6.16-7.03)    | 0.6165   |
| Albumin [g/L]              | 3.75 (3.44-3.93)                       | 3.30 (3.19-3.46)    | <0.0001* | 3.40 (3.27-3.65)    | 3.22 (3.14-3.45)    | 0.0118*  |
| Prealbumin[g/dL]           | 0.20 (0.20-0.20)                       | 0.20 (0.20-0.20)    | 0.6641   | 0.20 (0.20-0.27)    | 0.20 (0.20-0.30)    | 0.6329   |
| Transferrin [g/L]          | 2.50 (1.80-2.08)                       | 2.50 (2.00-2.95)    | 0.7678   | 2.30 (2.00-2.97)    | 2.60 (2.10-2.90)    | 0.7340   |
| FM [kg]                    | 19.96 (15.79-23.31)                    | 17.24 (12.36-24.99) | 0.3022   | 18.65 (13.88-23.63) | 20.34 (11.88-30.17) | 0.9313   |
| FM%                        | 25.24 (24.30-33.82)                    | 27.54 (22.20-35.40) | 0.9413   | 26.70 (23.66-34.06) | 29.36 (20.18-34.61) | 0.9570   |
| FFM [kg]                   | 45.55 (41.11-54.22)                    | 47.85 (44.67-53.22) | 0.8538   | 45.86 (44.52-53.18) | 50.65 (44.98-53.47) | 0.2719   |
| FFM%                       | 74.76 (66.04-75.88)                    | 72.58 (64.62-79.08) | 0.9902   | 73.94 (66.04-76.54) | 70.63 (65.15-80.44) | 0.9399   |
| FFMI [kg/m <sup>2</sup> ]  | 16.38 (14.28-16.73)                    | 16.75 (15.82-18.46) | 0.0654   | 16.53 (14.65-18.27) | 16.80 (15.66-18.46) | 0.2154   |
| nFFMI [kg/m <sup>2</sup> ] | 16.38 (15.02-17.38)                    | 17.44 (16.15-19.01) | 0.0297*  | 17.22 (15.08-18.55) | 17.56 (15.93-19.01) | 0.2276   |

\* - statistically significant result.

Abbreviations: A – well-nourished patients, B – moderately malnourished patients, BMI - body mass index, C – severely malnourished patients, FM – fat mass, FFM – fat-free mass, FFMI - fat-free mass index, nFFMI - normalized fat-free mass index, SGA – Subjective Global Assessment.

**Table S3.** Comparison of demographic, clinical and nutritional variables depending on NRS or CWL.

| Variable                   | NRS-2002<br>median<br>(interquartile range) |                        |          | CWL<br>median<br>(interquartile range) |                        |          |
|----------------------------|---------------------------------------------|------------------------|----------|----------------------------------------|------------------------|----------|
|                            | <3                                          | ≥3                     | <i>p</i> | No                                     | Yes                    | <i>p</i> |
| Age [years]                | 62.00<br>(56.00-70.00)                      | 63.00<br>(56.50-66.00) | 0.9911   | 64.00<br>(57.00-68.00)                 | 61.00<br>(56.00-70.00) | 0.9114   |
| Weight [kg]                | 67.50<br>(58.00-74.00)                      | 60.00<br>(51.25-67.75) | 0.0274*  | 68.50<br>(65.00-75.00)                 | 64.00<br>(54.75-69.00) | 0.0341*  |
| BMI [kg/m <sup>2</sup> ]   | 22.91<br>(21.09-25.69)                      | 19.69<br>(18.29-24.20) | 0.0067*  | 22.90<br>(21.48-25.37)                 | 22.84<br>(19.69-25.10) | 0.4649   |
| Total protein[g/L]         | 6.60<br>(6.21-6.93)                         | 6.61<br>(6.22-7.09)    | 0.7894   | 6.70<br>(6.24-7.09)                    | 6.55<br>(6.22-6.88)    | 0.2825   |
| Albumin [g/L]              | 3.34<br>(3.19-3.52)                         | 3.41<br>(3.26-3.58)    | 0.5156   | 3.37<br>(3.19-3.69)                    | 3.36<br>(3.23-3.55)    | 0.9785   |
| Prealbumin[g/dL]           | 0.20<br>(0.20-0.30)                         | 0.20<br>(0.20-0.27)    | 0.4920   | 0.20<br>(0.20-0.20)                    | 0.20<br>(0.20-0.30)    | 0.8167   |
| Transferrin [g/L]          | 2.50<br>(2.00-3.10)                         | 2.20<br>(1.82-2.67)    | 0.1721   | 2.25<br>(2.00-2.70)                    | 2.50<br>(1.97-3.10)    | 0.4171   |
| FM [kg]                    | 19.95<br>(14.40-29.96)                      | 16.17<br>(11.88-23.09) | 0.0508   | 19.63<br>(15.26-27.72)                 | 16.79<br>(11.71-23.62) | 0.1340   |
| FM%                        | 26.94<br>(23.65-34.52)                      | 26.29<br>(21.97-34.49) | 0.6126   | 26.09<br>(23.90-33.94)                 | 26.70<br>(21.97-35.07) | 0.7387   |
| FFM [kg]                   | 40.06<br>(44.98-53.47)                      | 45.86<br>(43.25-52.60) | 0.1495   | 53.47<br>(45.75-57.35)                 | 45.64<br>(44.52-50.46) | 0.0026*  |
| FFM%                       | 73.24<br>(65.48-76.54)                      | 73.94<br>(65.45-82.48) | 0.3945   | 74.00<br>(66.06-76.20)                 | 73.94<br>(64.89-82.48) | 0.6603   |
| FFMI [kg/m <sup>2</sup> ]  | 16.78<br>(16.14-18.54)                      | 16.08<br>(14.50-16.74) | 0.0155*  | 18.07<br>(16.26-19.03)                 | 16.52<br>(14.74-16.80) | 0.0064*  |
| nFFMI [kg/m <sup>2</sup> ] | 17.44<br>(16.63-18.81)                      | 16.38<br>(14.74-17.63) | 0.0129*  | 18.53<br>(16.51-20.02)                 | 17.15<br>(15.07-17.79) | 0.0134*  |

\* - statistically significant result.

Abbreviations: BMI - body mass index, CWL – critical weight loss, FM – fat mass, FFM – fat-free mass, FFMI - fat-free mass index, nFFMI - normalized fat-free mass index, NRS-2002 – nutritional risk screening 2002.
